# Supplementary material for: Health and longevity studies in C. elegans: the “healthy worm database” reveals strengths, weaknesses and gaps of test compound-based studies
Source: PubMed Central journal article supplement (PMC7973913; doi:10.1007/s10522-021-09913-2), 2021-03-08
Supplement: 10522_2021_9913_MOESM2_ESM.pdf [file 10522_2021_9913_MOESM2_ESM.pdf]

**Title: Health and longevity studies in *C. elegans*: The “Healthy Worm Database” reveals strengths, weaknesses and gaps of test compound-based studies**

**Journal:** Biogerontology

**Authors:** Nadine Saul, Steffen Möller, Francesca Cirulli, Alessandra Berry, Walter Luyten, Georg Fuellen

**Corresponding author:** Nadine Saul, Molecular Genetics Group, Institute of Biology, Humboldt University of Berlin, 10115 Berlin, Germany; Email: nadine.saul@gmx.de

**ESM\_2: Health-related measurements**

| Phenotype Group        | Phenotype                                                  | Number of compounds |
|------------------------|------------------------------------------------------------|---------------------|
| healthspan biomarkers  | acetylcholine level                                        | 1                   |
| healthspan biomarkers  | activity / quantity / expression of CTLs                   | 29                  |
| healthspan biomarkers  | activity / quantity / expression of CYPs                   | 4                   |
| healthspan biomarkers  | activity / quantity / expression of GCS-1                  | 2                   |
| healthspan biomarkers  | activity / quantity / expression of glutathione peroxidase | 4                   |
| healthspan biomarkers  | activity / quantity / expression of GPDHs                  | 1                   |
| healthspan biomarkers  | activity / quantity / expression of GSTs                   | 55                  |
| healthspan biomarkers  | activity / quantity / expression of HSPs                   | 62                  |
| healthspan biomarkers  | activity / quantity / expression of SKN-1                  | 1                   |
| healthspan biomarkers  | activity / quantity / expression of SODs                   | 66                  |
| healthspan biomarkers  | activity / quantity / expression of UGTs                   | 1                   |
| healthspan biomarkers  | activity of acetylcholinesterase                           | 4                   |
| cognitive function     | aldicarb resistance                                        | 1                   |
| healthspan biomarkers  | AMP:ATP ratio                                              | 1                   |
| healthspan biomarkers  | antioxidative capacity                                     | 4                   |
| physiological function | arsenite stress resistance                                 | 1                   |
| healthspan biomarkers  | ATP level                                                  | 8                   |
| healthspan biomarkers  | autofluorescence (age pigment / lipofuscin)                | 54                  |
| healthspan biomarkers  | axonal dystrophy                                           | 3                   |
| physical function      | body length / growth rate                                  | 52                  |
| cognitive function     | chemotaxis                                                 | 20                  |
| healthspan biomarkers  | concentration of N(6)-Carboxymethyllysine (CML)            | 4                   |
| physical function      | duration of defecation cycles                              | 3                   |
| healthspan biomarkers  | F3-isoprostane level                                       | 1                   |
| physical function      | fast body movement span                                    | 6                   |
| physical function      | fast pharyngeal pumping span                               | 2                   |
| physical function      | food consumption                                           | 5                   |
| healthspan biomarkers  | GSH level                                                  | 9                   |
| physiological function | heat stress resistance                                     | 202                 |
| healthspan biomarkers  | hexokinase activity                                        | 1                   |
| healthspan biomarkers  | intestinal bacteria colonization                           | 1                   |
| healthspan biomarkers  | lactate level                                              | 2                   |
| healthspan biomarkers  | level of 4-HNE                                             | 1                   |
| healthspan biomarkers  | level of autophagy                                         | 7                   |
| healthspan biomarkers  | lipase activity                                            | 1                   |
| lifespan               | maximum lifespan                                           | 103                 |

|                               |                                           |     |
|-------------------------------|-------------------------------------------|-----|
| <b>healthspan biomarkers</b>  | MDA level                                 | 13  |
| <b>lifespan</b>               | mean lifespan                             | 288 |
| <b>cognitive function</b>     | mechanical sensory / touch response       | 9   |
| <b>lifespan</b>               | median lifespan                           | 76  |
| <b>cognitive function</b>     | memory                                    | 1   |
| <b>physiological function</b> | metal stress resistance                   | 1   |
| <b>lifespan</b>               | minimum lifespan                          | 10  |
| <b>healthspan biomarkers</b>  | mitochondrial content/quality             | 5   |
| <b>healthspan biomarkers</b>  | mitochondrial DNA (mtDNA) integrity       | 1   |
| <b>healthspan biomarkers</b>  | mitochondrial DNA copy number             | 1   |
| <b>healthspan biomarkers</b>  | mitochondrial membrane potential          | 2   |
| <b>healthspan biomarkers</b>  | mitochondrial ROS production              | 1   |
| <b>healthspan biomarkers</b>  | muscle integrity                          | 5   |
| <b>cognitive function</b>     | neuronal survival                         | 7   |
| <b>reproductive function</b>  | number of offspring                       | 92  |
| <b>reproductive function</b>  | onset of egg laying                       | 9   |
| <b>physiological function</b> | osmotic stress resistance                 | 7   |
| <b>physiological function</b> | oxidative stress resistance               | 213 |
| <b>healthspan biomarkers</b>  | oxygen consumption rate (OCR)             | 7   |
| <b>physiological function</b> | pathogen stress resistance                | 7   |
| <b>physical function</b>      | pharyngeal pumping                        | 91  |
| <b>physical function</b>      | pharyngeal total span                     | 4   |
| <b>healthspan biomarkers</b>  | phosphofructokinase activity              | 1   |
| <b>healthspan biomarkers</b>  | phosphorylation level of PMK-1            | 1   |
| <b>healthspan biomarkers</b>  | proteasomal activity                      | 9   |
| <b>healthspan biomarkers</b>  | pyruvate kinase activity                  | 1   |
| <b>healthspan biomarkers</b>  | pyruvate level                            | 2   |
| <b>healthspan biomarkers</b>  | quantity of apoptotic cells               | 2   |
| <b>healthspan biomarkers</b>  | quantity of carbonylated proteins         | 6   |
| <b>reproductive function</b>  | quantity of dauer formation               | 4   |
| <b>cognitive function</b>     | quantity of D-type GABAergic motorneurons | 1   |
| <b>reproductive function</b>  | quantity of early reproduction            | 17  |
| <b>reproductive function</b>  | quantity of embryonic lethality           | 1   |
| <b>healthspan biomarkers</b>  | quantity of germline stem cells           | 1   |
| <b>reproductive function</b>  | quantity of internal hatch                | 1   |
| <b>reproductive function</b>  | quantity of late reproduction             | 12  |
| <b>healthspan biomarkers</b>  | quantity of polyQ aggregates              | 11  |
| <b>healthspan biomarkers</b>  | quantity of $\beta$ -amyloid              | 16  |
| <b>healthspan biomarkers</b>  | quantity of $\alpha$ -synuclein           | 16  |
| <b>reproductive function</b>  | reproductive growth span                  | 1   |
| <b>reproductive function</b>  | reproductive total span                   | 10  |
| <b>healthspan biomarkers</b>  | ROS level                                 | 113 |
| <b>physiological function</b> | salt stress resistance                    | 1   |
| <b>reproductive function</b>  | speed of larval development               | 13  |
| <b>lifespan</b>               | survival at a given time point            | 3   |
| <b>healthspan biomarkers</b>  | thiol level                               | 2   |
| <b>healthspan biomarkers</b>  | translocation of DAF-16 to nucleus        | 73  |

|                               |                                                    |    |
|-------------------------------|----------------------------------------------------|----|
| <b>healthspan biomarkers</b>  | translocation of SKN-1 to nucleus                  | 16 |
| <b>healthspan biomarkers</b>  | triglyceride / fat / lipid content                 | 27 |
| <b>physiological function</b> | UV stress resistance                               | 18 |
| <b>physical function</b>      | velocity / motility / body movement in liquid      | 24 |
| <b>physical function</b>      | velocity / motility / body movement on solid media | 85 |
| <b>reproductive function</b>  | vertex (progeny per day)                           | 21 |
