# Supplementary material for: Health and longevity studies in C. elegans: the “healthy worm database” reveals strengths, weaknesses and gaps of test compound-based studies
Source: PubMed Central journal article supplement (PMC7973913; doi:10.1007/s10522-021-09913-2), 2021-03-08
Supplement: 10522_2021_9913_MOESM4_ESM.pdf [file 10522_2021_9913_MOESM4_ESM.pdf]

**Title: Health and longevity studies in *C. elegans*: The “Healthy Worm Database” reveals strengths, weaknesses and gaps of test compound-based studies**

**Journal:** Biogerontology

**Authors:** Nadine Saul, Steffen Möller, Francesca Cirulli, Alessandra Berry, Walter Luyten, Georg Fuellen

**Corresponding author:** Nadine Saul, Molecular Genetics Group, Institute of Biology, Humboldt University of Berlin, 10115 Berlin, Germany; Email: nadine.saul@gmx.de

**ESM\_4: Criteria for the inclusion and exclusion of scientific papers**

|                            | <b>Inclusion criteria</b>                                                                                                                                                                               | <b>Exclusion criteria</b>                                                                                                                                                                                             |
|----------------------------|---------------------------------------------------------------------------------------------------------------------------------------------------------------------------------------------------------|-----------------------------------------------------------------------------------------------------------------------------------------------------------------------------------------------------------------------|
| <b>Language</b>            | English                                                                                                                                                                                                 | Non-English language of the full text                                                                                                                                                                                 |
| <b>Search engine</b>       | PubMed                                                                                                                                                                                                  |                                                                                                                                                                                                                       |
| <b>Publication type</b>    | Short communications, research articles, book chapters                                                                                                                                                  | Conference posters or talks, protocols, reviews, newspaper articles, commercial reports, dissertations, master theses, bachelor theses, other student reports, videos                                                 |
| <b>Year of publication</b> | All                                                                                                                                                                                                     | No digital full text or pdf file available                                                                                                                                                                            |
| <b>Treatment</b>           | Evaluation of at least one chemical treatment (natural or synthetic single compound, and mixtures as well as natural plant preparations, extracts or fractions)                                         | Biological (all living organisms), physical (such as exercise, gravity, or radiation), genetic (such as gene knockout or knockdown), psychological/social (such as crowding level) treatments, or no treatment at all |
| <b>Organisms</b>           | <i>Caenorhabditis elegans</i>                                                                                                                                                                           |                                                                                                                                                                                                                       |
| <b>Observations</b>        | <ul style="list-style-type: none"> <li>• Physical function</li> <li>• Physiological function</li> <li>• Cognitive function</li> <li>• Reproductive function</li> <li>• Healthspan biomarkers</li> </ul> | Only lifespan assays, toxicity tests, computational modelling, or demonstration of a new test system                                                                                                                  |
